# Supplementary material
Source: PubMed Central journal article supplement (PMC6293444)
Supplement: ct8b00909_si_001.pdf [file ct8b00909_si_001.pdf]

**Supporting Information for:**

**Optimizing Non-bonded Interactions of the**

**OPLS Force Field for Aqueous Solutions of**

**Carbohydrates: How to Capture Both**

**Thermodynamics and Dynamics**

Seyed Hossein Jamali,<sup>†</sup> Thijs van Westen,<sup>‡,¶</sup> Othonas A. Moulτος,<sup>†</sup> and Thijs J.  
H. Vlugt<sup>\*,†</sup>

*<sup>†</sup>Engineering Thermodynamics, Process & Energy Department, Faculty of Mechanical,  
Maritime and Materials Engineering, Delft University of Technology, Leeghwaterstraat 39,  
2628CB Delft, the Netherlands*

*<sup>‡</sup>Institute AMOLF, Science park 104, 1098XG, Amsterdam, The Netherlands*

*<sup>¶</sup>Institute of Thermodynamics and Thermal Process Engineering, University of Stuttgart,  
Pfaffenwaldring 9, D-70569 Stuttgart, Germany*

E-mail: t.j.h.vlugt@tudelft.nl

# S1 OPLS force field parameters

In force field-based molecular simulation, the interactions between atoms are due to non-bonded and bonded interaction potentials:<sup>1</sup>

$$U = U_{\text{non-bonded}} + U_{\text{bonded}} \quad (\text{S1})$$

The non-bonded interactions between two atoms  $i$  and  $j$ , separated by a distance  $r_{ij}$ , consist of two parts:

$$U_{\text{non-bonded}}(r_{ij}) = U_{\text{LJ}}(r_{ij}) + U_{\text{Coulomb}}(r_{ij}) = 4\epsilon \left[ \left( \frac{\sigma}{r_{ij}} \right)^{12} - \left( \frac{\sigma}{r_{ij}} \right)^6 \right] + \frac{q_i q_j}{4\pi\epsilon_0 r_{ij}} \quad (\text{S2})$$

in which  $q_i$  is the partial atomic charge of atom  $i$ ,  $\epsilon_0$  is the permittivity of vacuum, and  $\epsilon$  and  $\sigma$  are the Lennard-Jones parameters. The interaction parameters of dissimilar atoms are calculated from the standard OPLS force field mixing rules:<sup>2,3</sup>

$$\begin{aligned} \sigma_{ij} &= \sqrt{\sigma_{ii} \cdot \sigma_{jj}} \\ \epsilon_{ij} &= \sqrt{\epsilon_{ii} \cdot \epsilon_{jj}} \end{aligned} \quad (\text{S3})$$

In this study, the Lennard-Jones (LJ) parameters and partial atomic charges of the OPLS force field for carbohydrates<sup>3</sup> are rescaled so that thermodynamic and transport properties of water-sucrose mixtures are reproduced. The optimum scaling factors for the LJ energy parameter ( $\epsilon$ ) and partial atomic charges ( $q$ ) are 0.80 and 0.95, respectively. The interaction sites for sucrose and glucose are shown in Figure S1. The non-bonded interaction parameters of the original and refined OPLS force fields for sucrose and glucose molecules are listed in Tables S1 and S2, respectively.

The bonded contribution to the total energy consists of three parts due to bond-stretching,

bond-angle bending, and dihedral angle torsion:<sup>2,3</sup>

$$U_{\text{bonded}} = U_{\text{bond}} + U_{\text{angle}} + U_{\text{torsion}} \quad (\text{S4})$$

These terms are defined as follows:<sup>2,3</sup>

$$U_{\text{bond}} = \sum_{\text{bonds}} K_b (r - r_0)^2 \quad (\text{S5})$$

$$U_{\text{angle}} = \sum_{\text{angles}} K_\theta (\theta - \theta_0)^2 \quad (\text{S6})$$

$$U_{\text{torsion}} = \sum_{\text{dihedrals}} \left[ \frac{V_1}{2} (1 + \cos \phi) + \frac{V_2}{2} (1 - \cos 2\phi) + \frac{V_3}{2} (1 + \cos 3\phi) \right] \quad (\text{S7})$$

where  $r$ ,  $\theta$ ,  $\phi$  are the bond lengths, bond angles, and dihedral angles in a configuration of the molecule.  $r_0$  and  $\theta_0$  are the equilibrium bond lengths and bond angles, respectively.  $K_r$ ,  $K_\theta$ ,  $V_i$  are the coefficients of these bonded potentials. For sucrose and glucose, the bonded parameters are provided in Tables S3 to S5 and Tables S6 to S8, respectively.

## S2 Results

Thermodynamic and transport properties of water-sucrose and water-glucose mixtures were computed based on the scaled non-bonded parameters of the OPLS force field. Five mass fractions of sucrose-water ( $w_{\text{sucrose}} = 20\%, 30\%, 40\%, 50\%, \text{ and } 60\%$ ) and four mass fractions of glucose-water ( $w_{\text{glucose}} = 20\%, 30\%, 40\%, \text{ and } 50\%$ ) were considered. Temperature and pressure in all MD simulations are 298 K and 1 atm, respectively. Computed thermodynamic factors and shear viscosities used for optimizing the OPLS<sup>2,3</sup> force field parameters and comparing the original<sup>4</sup> and modified<sup>5</sup> GLYCAM06 force fields are reported in Tables S9 and S10. These computed properties are shown in Figures 2 to 4 of the main text. The computed liquid densities, thermodynamic factors, self-diffusivities of water, self-diffusivities of sucrose, and mutual diffusion coefficients of water-sucrose mixtures are reported in Tables S11 to S16, respectively. Similarly, these properties are listed in Tables S17 to S22 for water-glucose mixtures. For both mixtures, the computed properties are shown in Figures 5 and 6 of the main text.

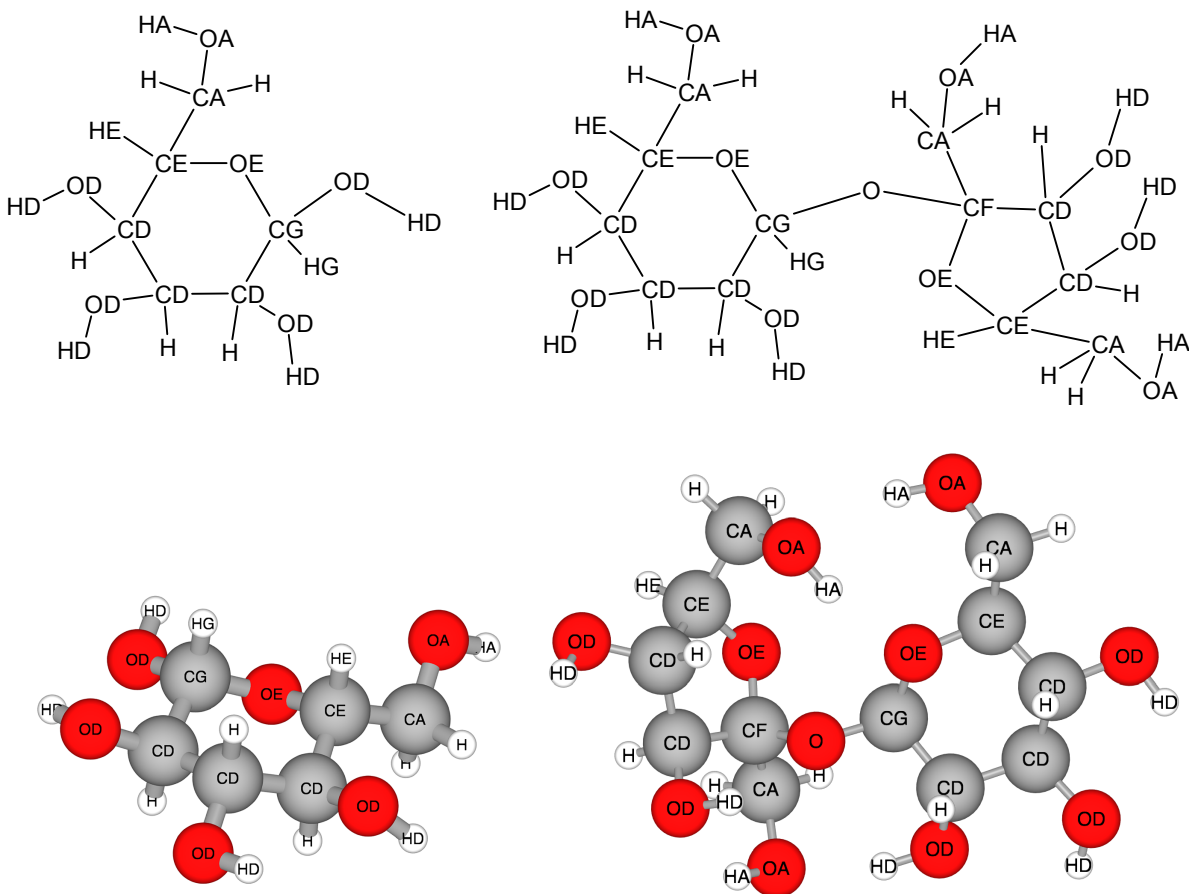

Figure S1: Schematic and atomistic representations of glucose and sucrose with the presentation of all interaction sites. The atomistic representation was created by using iRASPA.<sup>6</sup> The non-bonded and bonded interaction parameters for both molecules are listed in Tables S1 and S2, and Tables S3 to S8, respectively.

Table S1: Non-bonded interaction parameters (Equation (S2)) of the original and refined OPLS<sup>3</sup> force fields for sucrose. LJ energy parameters and partial atomic charges are scaled with factors of 0.8 and 0.95, respectively.

| Atom | original OPLS         |              |         | refined OPLS          |              |          |
|------|-----------------------|--------------|---------|-----------------------|--------------|----------|
|      | $\epsilon$ (kcal/mol) | $\sigma$ (Å) | $q$ (e) | $\epsilon$ (kcal/mol) | $\sigma$ (Å) | $q$ (e)  |
| CA   | 0.066                 | 3.5          | 0.145   | 0.0528                | 3.5          | 0.13775  |
| CD   | 0.066                 | 3.5          | 0.205   | 0.0528                | 3.5          | 0.19475  |
| CE   | 0.066                 | 3.5          | 0.17    | 0.0528                | 3.5          | 0.1615   |
| CF   | 0.066                 | 3.5          | 0.4     | 0.0528                | 3.5          | 0.38     |
| CG   | 0.066                 | 3.5          | 0.3     | 0.0528                | 3.5          | 0.285    |
| H    | 0.03                  | 2.5          | 0.06    | 0.024                 | 2.5          | 0.057    |
| HA   | 0                     | 0            | 0.418   | 0                     | 0            | 0.3971   |
| HD   | 0                     | 0            | 0.435   | 0                     | 0            | 0.41325  |
| HE   | 0.03                  | 2.5          | 0.03    | 0.024                 | 2.5          | 0.0285   |
| HG   | 0.03                  | 2.5          | 0.1     | 0.024                 | 2.5          | 0.095    |
| O    | 0.14                  | 2.9          | -0.4    | 0.112                 | 2.9          | -0.38    |
| OA   | 0.17                  | 3.12         | -0.683  | 0.136                 | 3.12         | -0.64885 |
| OD   | 0.17                  | 3.07         | -0.7    | 0.136                 | 3.07         | -0.665   |
| OE   | 0.14                  | 2.9          | -0.4    | 0.112                 | 2.9          | -0.38    |

Table S2: Non-bonded interaction parameters (Equation (S2)) of the original and refined OPLS<sup>3</sup> force fields for glucose. LJ energy parameters and partial atomic charges are scaled with factors of 0.8 and 0.95, respectively.

| Atom | original OPLS         |              |         | refined OPLS          |              |          |
|------|-----------------------|--------------|---------|-----------------------|--------------|----------|
|      | $\epsilon$ (kcal/mol) | $\sigma$ (Å) | $q$ (e) | $\epsilon$ (kcal/mol) | $\sigma$ (Å) | $q$ (e)  |
| CA   | 0.066                 | 3.5          | 0.145   | 0.0528                | 3.5          | 0.13775  |
| CD   | 0.066                 | 3.5          | 0.205   | 0.0528                | 3.5          | 0.19475  |
| CE   | 0.066                 | 3.5          | 0.17    | 0.0528                | 3.5          | 0.1615   |
| CG   | 0.066                 | 3.5          | 0.365   | 0.0528                | 3.5          | 0.34675  |
| H    | 0.03                  | 2.5          | 0.06    | 0.024                 | 2.5          | 0.057    |
| HA   | 0                     | 0            | 0.418   | 0                     | 0            | 0.3971   |
| HD   | 0                     | 0            | 0.435   | 0                     | 0            | 0.41325  |
| HE   | 0.03                  | 2.5          | 0.03    | 0.024                 | 2.5          | 0.0285   |
| HG   | 0.03                  | 2.5          | 0.1     | 0.024                 | 2.5          | 0.095    |
| OA   | 0.17                  | 3.12         | -0.683  | 0.136                 | 3.12         | -0.64885 |
| OD   | 0.17                  | 3.07         | -0.7    | 0.136                 | 3.07         | -0.665   |
| OE   | 0.14                  | 2.9          | -0.4    | 0.112                 | 2.9          | -0.38    |

Table S3: bond-stretching parameters (Equation (S5)) of the OPLS force field for sucrose.<sup>3</sup> Interaction sites for sucrose are shown in Figure S1.

| Bond  | $K_b$ (kcal/mol/Å <sup>2</sup> ) | $r_0$ (Å) |
|-------|----------------------------------|-----------|
| CA-CE | 268                              | 1.529     |
| CA-CF | 268                              | 1.529     |
| CA-H  | 340                              | 1.09      |
| CA-OA | 320                              | 1.41      |
| CD-CD | 268                              | 1.529     |
| CD-CE | 268                              | 1.529     |
| CD-CF | 268                              | 1.529     |
| CD-CG | 268                              | 1.529     |
| CD-H  | 340                              | 1.09      |
| CD-OD | 320                              | 1.41      |
| CE-HE | 340                              | 1.09      |
| CE-OE | 320                              | 1.41      |
| CF-O  | 320                              | 1.38      |
| CF-OE | 320                              | 1.38      |
| CG-HG | 340                              | 1.09      |
| CG-O  | 320                              | 1.38      |
| CG-OE | 320                              | 1.38      |
| HA-OA | 553                              | 0.945     |
| HD-OD | 553                              | 0.945     |



Table S4: bond-angle bending parameters (Equation (S6)) of the OPLS force field for sucrose.<sup>3</sup> Interaction sites for sucrose are shown in Figure S1.

| Bond     | $K_\theta$ (kcal/mol/rad <sup>2</sup> ) | $\theta_0$ (°) |
|----------|-----------------------------------------|----------------|
| CA-CE-CD | 58.35                                   | 112.7          |
| CA-CE-HE | 37.5                                    | 110.7          |
| CA-CE-OE | 50                                      | 109.5          |
| CA-CF-CD | 58.35                                   | 112.7          |
| CA-CF-O  | 50                                      | 109.5          |
| CA-CF-OE | 50                                      | 109.5          |
| CA-OA-HA | 55                                      | 108.5          |
| CD-CD-CD | 58.35                                   | 112.7          |
| CD-CD-CE | 58.35                                   | 112.7          |
| CD-CD-CF | 58.35                                   | 112.7          |
| CD-CD-CG | 58.35                                   | 112.7          |
| CD-CD-H  | 37.5                                    | 110.7          |
| CD-CD-OD | 50                                      | 109.5          |
| CD-CE-HE | 37.5                                    | 110.7          |
| CD-CE-OE | 50                                      | 109.5          |
| CD-CF-O  | 50                                      | 109.5          |
| CD-CF-OE | 50                                      | 109.5          |
| CD-CG-HG | 37.5                                    | 110.7          |
| CD-CG-O  | 50                                      | 109.5          |
| CD-CG-OE | 50                                      | 109.5          |
| CD-OD-HD | 55                                      | 108.5          |
| CE-CA-H  | 37.5                                    | 110.7          |
| CE-CA-OA | 50                                      | 109.5          |
| CE-CD-H  | 37.5                                    | 110.7          |
| CE-CD-OD | 50                                      | 109.5          |
| CE-OE-CF | 60                                      | 109.5          |
| CE-OE-CG | 60                                      | 109.5          |
| CF-CA-H  | 37.5                                    | 110.7          |
| CF-CA-OA | 50                                      | 109.5          |
| CF-CD-H  | 37.5                                    | 110.7          |
| CF-CD-OD | 50                                      | 109.5          |
| CF-O-CG  | 60                                      | 109.5          |
| CG-CD-H  | 37.5                                    | 110.7          |
| CG-CD-OD | 50                                      | 109.5          |
| H-CA-H   | 33                                      | 107.8          |
| H-CA-OA  | 35                                      | 109.5          |
| H-CD-OD  | 35                                      | 109.5          |
| HE-CE-OE | 35                                      | 109.5          |
| HG-CG-O  | 35                                      | 109.5          |
| HG-CG-OE | 35                                      | 109.5          |
| O-CF-OE  | 92.6                                    | 111.55         |
| O-CG-OE  | 92.6                                    | 111.55         |

Table S5: Dihedral angle torsion parameters (Equation (S7)) of the OPLS force field for sucrose.<sup>3</sup> All  $V_1$ ,  $V_2$ , and  $V_3$  coefficients are reported in units of kcal/mol. Interaction sites for sucrose are shown in Figure S1.

| Dihedral angle | $V_1$  | $V_2$  | $V_3$ | Dihedral angle | $V_1$  | $V_2$  | $V_3$ |
|----------------|--------|--------|-------|----------------|--------|--------|-------|
| CA-CE-OE-CF    | 0.65   | -0.25  | 0.67  | H-CA-CF-O      | 0      | 0      | 0.468 |
| CA-CE-OE-CG    | 0.65   | -0.25  | 0.67  | H-CA-CF-OE     | 0      | 0      | 0.468 |
| CA-CF-O-CG     | 0.65   | -0.25  | 0.67  | H-CA-OA-HA     | 0      | 0      | 0.45  |
| CA-CF-OE-CE    | 0.65   | -0.25  | 0.67  | H-CD-CD-H      | 0      | 0      | 0.318 |
| CD-CD-CD-CE    | 1.74   | -0.157 | 0.279 | H-CD-CD-OD     | 0      | 0      | 0.468 |
| CD-CD-CD-CG    | 1.74   | -0.157 | 0.279 | H-CD-CE-CA     | 0      | 0      | 0.366 |
| CD-CD-CD-H     | 0      | 0      | 0.366 | H-CD-CE-HE     | 0      | 0      | 0.318 |
| CD-CD-CD-OD    | -1.336 | 0      | 0     | H-CD-CE-OE     | 0      | 0      | 0.468 |
| CD-CD-CE-CA    | 1.74   | -0.157 | 0.279 | H-CD-CF-CA     | 0      | 0      | 0.366 |
| CD-CD-CE-HE    | 0      | 0      | 0.366 | H-CD-CF-O      | 0      | 0      | 0.468 |
| CD-CD-CE-OE    | -1.336 | 0      | 0     | H-CD-CF-OE     | 0      | 0      | 0.468 |
| CD-CD-CF-CA    | 1.74   | -0.157 | 0.279 | H-CD-CG-HG     | 0      | 0      | 0.318 |
| CD-CD-CF-O     | -1.336 | 0      | 0     | H-CD-CG-O      | 0      | 0      | 0.468 |
| CD-CD-CF-OE    | -1.336 | 0      | 0     | H-CD-CG-OE     | 0      | 0      | 0.468 |
| CD-CD-CG-HG    | 0      | 0      | 0.366 | H-CD-OD-HD     | 0      | 0      | 0.45  |
| CD-CD-CG-O     | -1.336 | 0      | 0     | HE-CE-OE-CF    | 0      | 0      | 0.76  |
| CD-CD-CG-OE    | -1.336 | 0      | 0     | HE-CE-OE-CG    | 0      | 0      | 0.76  |
| CD-CD-OD-HD    | 2.674  | -2.883 | 1.026 | HG-CG-O-CF     | 0      | 0      | 0.76  |
| CD-CE-OE-CF    | 0.65   | -0.25  | 0.67  | HG-CG-OE-CE    | 0      | 0      | 0.76  |
| CD-CE-OE-CG    | 0.65   | -0.25  | 0.67  | O-CF-OE-CE     | -0.375 | -1.358 | 0.004 |
| CD-CF-O-CG     | 0.65   | -0.25  | 0.67  | O-CG-OE-CE     | -0.375 | -1.358 | 0.004 |
| CD-CF-OE-CE    | 0.65   | -0.25  | 0.67  | OA-CA-CE-CD    | -1.336 | 0      | 0     |
| CD-CG-O-CF     | 0.65   | -0.25  | 0.67  | OA-CA-CE-HE    | 0      | 0      | 0.468 |
| CD-CG-OE-CE    | 0.65   | -0.25  | 0.67  | OA-CA-CE-OE    | 4.319  | 0      | 0     |
| CE-CA-OA-HA    | 2.674  | -2.883 | 1.026 | OA-CA-CF-CD    | -1.336 | 0      | 0     |
| CE-CD-CD-CF    | 1.74   | -0.157 | 0.279 | OA-CA-CF-O     | 4.319  | 0      | 0     |
| CE-CD-CD-H     | 0      | 0      | 0.366 | OA-CA-CF-OE    | 4.319  | 0      | 0     |
| CE-CD-CD-OD    | -1.336 | 0      | 0     | OD-CD-CD-OD    | 9.066  | 0      | 0     |
| CE-CD-OD-HD    | 2.674  | -2.883 | 1.026 | OD-CD-CE-CA    | -1.336 | 0      | 0     |
| CF-CA-OA-HA    | 2.674  | -2.883 | 1.026 | OD-CD-CE-HE    | 0      | 0      | 0.468 |
| CF-CD-CD-H     | 0      | 0      | 0.366 | OD-CD-CE-OE    | 4.319  | 0      | 0     |
| CF-CD-CD-OD    | -1.336 | 0      | 0     | OD-CD-CF-CA    | -1.336 | 0      | 0     |
| CF-CD-OD-HD    | 2.674  | -2.883 | 1.026 | OD-CD-CF-O     | 4.319  | 0      | 0     |
| CG-CD-CD-H     | 0      | 0      | 0.366 | OD-CD-CF-OE    | 4.319  | 0      | 0     |
| CA-CE-OE-CF    | -1.336 | 0      | 0     | OD-CD-CG-HG    | 0      | 0      | 0.468 |
| CG-CD-OD-HD    | 2.674  | -2.883 | 1.026 | OD-CD-CG-O     | 4.319  | 0      | 0     |
| H-CA-CE-CD     | 0      | 0      | 0.366 | OD-CD-CG-OE    | 4.319  | 0      | 0     |
| H-CA-CE-HE     | 0      | 0      | 0.318 | OE-CF-O-CG     | -0.375 | -1.358 | 0.004 |
| H-CA-CE-OE     | 0      | 0      | 0.468 | OE-CG-O-CF     | -0.375 | -1.358 | 0.004 |
| H-CA-CF-CD     | 0      | 0      | 0.366 |                |        |        |       |

Table S6: bond-stretching parameters (Equation (S5)) of the OPLS force field for glucose.<sup>3</sup> Interaction sites for glucose are shown in Figure S1.

| Bond  | $K_b$ (kcal/mol/Å <sup>2</sup> ) | $r_0$ (Å) |
|-------|----------------------------------|-----------|
| CA-CE | 268                              | 1.529     |
| CA-H  | 340                              | 1.09      |
| CA-OA | 320                              | 1.41      |
| CD-CD | 268                              | 1.529     |
| CD-CE | 268                              | 1.529     |
| CD-CG | 268                              | 1.529     |
| CD-H  | 340                              | 1.09      |
| CD-OD | 320                              | 1.41      |
| CE-HE | 340                              | 1.09      |
| CE-OE | 320                              | 1.41      |
| CG-HG | 340                              | 1.09      |
| CG-OD | 320                              | 1.38      |
| CG-OE | 320                              | 1.38      |
| HA-OA | 553                              | 0.945     |
| HD-OD | 553                              | 0.945     |

Table S7: bond-angle bending parameters (Equation (S6)) of the OPLS force field for glucose.<sup>3</sup> Interaction sites for glucose are shown in Figure S1.

| Bond     | $K_\theta$ (kcal/mol/rad <sup>2</sup> ) | $\theta_0$ (°) |
|----------|-----------------------------------------|----------------|
| CA-CE-CD | 58.35                                   | 112.7          |
| CA-CE-HE | 37.5                                    | 110.7          |
| CA-CE-OE | 50                                      | 109.5          |
| CA-OA-HA | 55                                      | 108.5          |
| CD-CD-CD | 58.35                                   | 112.7          |
| CD-CD-CE | 58.35                                   | 112.7          |
| CD-CD-CG | 58.35                                   | 112.7          |
| CD-CD-H  | 37.5                                    | 110.7          |
| CD-CD-OD | 50                                      | 109.5          |
| CD-CE-HE | 37.5                                    | 110.7          |
| CD-CE-OE | 50                                      | 109.5          |
| CD-CG-HG | 37.5                                    | 110.7          |
| CD-CG-OD | 50                                      | 109.5          |
| CD-CG-OE | 50                                      | 109.5          |
| CD-OD-HD | 55                                      | 108.5          |
| CE-CA-H  | 37.5                                    | 110.7          |
| CE-CA-OA | 50                                      | 109.5          |
| CE-CD-H  | 37.5                                    | 110.7          |
| CE-CD-OD | 50                                      | 109.5          |
| CE-OE-CG | 60                                      | 109.5          |
| CG-CD-H  | 37.5                                    | 110.7          |
| CG-CD-OD | 50                                      | 109.5          |
| CG-OD-HD | 55                                      | 108.5          |
| H-CA-H   | 33                                      | 107.8          |
| H-CA-OA  | 35                                      | 109.5          |
| H-CD-OD  | 35                                      | 109.5          |
| HE-CE-OE | 35                                      | 109.5          |
| HG-CG-OD | 35                                      | 109.5          |
| HG-CG-OE | 35                                      | 109.5          |
| OD-CG-OE | 92.6                                    | 111.55         |

Table S8: Dihedral angle torsion parameters (Equation (S7)) of the OPLS force field for glucose.<sup>3</sup> All  $V_1$ ,  $V_2$ , and  $V_3$  coefficients are reported in units of kcal/mol. Interaction sites for glucose are shown in Figure S1.

| Dihedral angle | $V_1$  | $V_2$  | $V_3$ | Dihedral angle | $V_1$  | $V_2$  | $V_3$ |
|----------------|--------|--------|-------|----------------|--------|--------|-------|
| CA-CE-OE-CG    | 0.65   | -0.25  | 0.67  | H-CA-OA-HA     | 0      | 0      | 0.45  |
| CD-CD-CD-CE    | 1.74   | -0.157 | 0.279 | H-CD-CD-H      | 0      | 0      | 0.318 |
| CD-CD-CD-CG    | 1.74   | -0.157 | 0.279 | H-CD-CD-OD     | 0      | 0      | 0.468 |
| CD-CD-CD-H     | 0      | 0      | 0.366 | H-CD-CE-CA     | 0      | 0      | 0.366 |
| CD-CD-CD-OD    | -1.336 | 0      | 0     | H-CD-CE-HE     | 0      | 0      | 0.318 |
| CD-CD-CE-CA    | 1.74   | -0.157 | 0.279 | H-CD-CE-OE     | 0      | 0      | 0.468 |
| CD-CD-CE-HE    | 0      | 0      | 0.366 | H-CD-CG-HG     | 0      | 0      | 0.318 |
| CD-CD-CE-OE    | -1.336 | 0      | 0     | H-CD-CG-OD     | 0      | 0      | 0.468 |
| CD-CD-CG-HG    | 0      | 0      | 0.366 | H-CD-CG-OE     | 0      | 0      | 0.468 |
| CD-CD-CG-OD    | -1.336 | 0      | 0     | H-CD-OD-HD     | 0      | 0      | 0.45  |
| CD-CD-CG-OE    | -1.336 | 0      | 0     | HE-CE-OE-CG    | 0      | 0      | 0.76  |
| CD-CD-OD-HD    | 2.674  | -2.883 | 1.026 | HG-CG-OD-HD    | 0      | 0      | 0.45  |
| CD-CE-OE-CG    | 0.65   | -0.25  | 0.67  | HG-CG-OE-CE    | 0      | 0      | 0.76  |
| CD-CG-OD-HD    | 2.674  | -2.883 | 1.026 | OA-CA-CE-CD    | -1.336 | 0      | 0     |
| CD-CG-OE-CE    | 0.65   | -0.25  | 0.67  | OA-CA-CE-HE    | 0      | 0      | 0.468 |
| CE-CA-OA-HA    | 2.674  | -2.883 | 1.026 | OA-CA-CE-OE    | 4.319  | 0      | 0     |
| CE-CD-CD-H     | 0      | 0      | 0.366 | OD-CD-CD-OD    | 9.066  | 0      | 0     |
| CE-CD-CD-OD    | -1.336 | 0      | 0     | OD-CD-CE-CA    | -1.336 | 0      | 0     |
| CE-CD-OD-HD    | 2.674  | -2.883 | 1.026 | OD-CD-CE-HE    | 0      | 0      | 0.468 |
| CG-CD-CD-H     | 0      | 0      | 0.366 | OD-CD-CE-OE    | 4.319  | 0      | 0     |
| CG-CD-CD-OD    | -1.336 | 0      | 0     | OD-CD-CG-HG    | 0      | 0      | 0.468 |
| CG-CD-OD-HD    | 2.674  | -2.883 | 1.026 | OD-CD-CG-OD    | 4.319  | 0      | 0     |
| H-CA-CE-CD     | 0      | 0      | 0.366 | OD-CD-CG-OE    | 4.319  | 0      | 0     |
| H-CA-CE-HE     | 0      | 0      | 0.318 | OD-CG-OE-CE    | -0.375 | -1.358 | 0.004 |
| H-CA-CE-OE     | 0      | 0      | 0.468 | OE-CG-OD-HD    | -1.257 | -1.806 | 0.003 |

Table S9: Computed thermodynamic factors ( $\Gamma$ ) of water-sucrose mixtures reported in Figures 2 to 4 of the main text. Temperature and pressure are 298 K and 1 atm, respectively. LJ energy parameters ( $\epsilon$ ) and partial atomic charges ( $q$ ) are scaled by factors either 0.8 or 1. No additional independent simulations were performed to compute 95% confidence intervals.

| force field                   | OPLS <sup>2,3</sup> | OPLS <sup>2,3</sup> | OPLS <sup>2,3</sup> | OPLS <sup>2,3</sup> | GLYCAM06 <sup>4</sup> | GLYCAM06 <sup>5</sup> |
|-------------------------------|---------------------|---------------------|---------------------|---------------------|-----------------------|-----------------------|
| scaling factor for $\epsilon$ | 0.8                 | 0.8                 | 1                   | 1                   | original              | modified              |
| scaling factor for $q$        | 0.8                 | 1                   | 0.8                 | 1                   | -                     | -                     |
| $w_{\text{sucrose}}$          | $\Gamma$            | $\Gamma$            | $\Gamma$            | $\Gamma$            | $\Gamma$              | $\Gamma$              |
| 0.2                           | 0.73                | 0.38                | 1.16                | 0.99                | 0.33                  | 1.35                  |
| 0.3                           | 0.58                | 0.30                | 1.31                | 0.89                | 0.29                  | 1.63                  |
| 0.4                           | 0.56                | 0.29                | 1.61                | 1.08                | 0.28                  | 1.99                  |
| 0.5                           | 0.52                | 0.29                | 1.88                | 1.08                | 0.27                  | 2.54                  |
| 0.6                           | 0.53                | 0.26                | 1.83                | 1.13                | 0.42                  | 3.18                  |

Table S10: Computed shear viscosities ( $\eta$ ) of water-sucrose mixtures reported in Figures 2 to 4 of the main text. Temperature and pressure are 298 K and 1 atm, respectively. LJ energy parameters ( $\epsilon$ ) and partial atomic charges ( $q$ ) are scaled by factors either 0.8 or 1. All shear viscosities and 95% confidence intervals are reported in units of cP. 95% confidence intervals are computed from 5 independent simulations.

| force field                   | OPLS <sup>2,3</sup> |      | OPLS <sup>2,3</sup> |      | OPLS <sup>2,3</sup> |       | OPLS <sup>2,3</sup> |       | GLYCAM06 <sup>4</sup> |        | GLYCAM06 <sup>5</sup> |      |
|-------------------------------|---------------------|------|---------------------|------|---------------------|-------|---------------------|-------|-----------------------|--------|-----------------------|------|
| scaling factor for $\epsilon$ | 0.8                 |      | 0.8                 |      | 1                   |       | 1                   |       | original              |        | modified              |      |
| scaling factor for $q$        | 0.8                 |      | 1                   |      | 0.8                 |       | 1                   |       | -                     |        | -                     |      |
| $w_{\text{sucrose}}$          | $\bar{\eta}$        | 95%  | $\bar{\eta}$        | 95%  | $\bar{\eta}$        | 95%   | $\bar{\eta}$        | 95%   | $\bar{\eta}$          | 95%    | $\bar{\eta}$          | 95%  |
| 0.2                           | 1.12                | 0.04 | 1.15                | 0.07 | 1.48                | 0.14  | 1.45                | 0.08  | 1.13                  | 0.05   | 1.19                  | 0.03 |
| 0.3                           | 1.49                | 0.08 | 1.55                | 0.10 | 2.50                | 0.35  | 2.45                | 0.11  | 1.69                  | 0.16   | 1.80                  | 0.13 |
| 0.4                           | 2.27                | 0.27 | 2.50                | 0.40 | 5.41                | 0.42  | 5.59                | 0.31  | 10.28                 | 4.06   | 3.31                  | 0.34 |
| 0.5                           | 4.10                | 0.23 | 7.07                | 0.68 | 20.20               | 2.86  | 23.00               | 4.60  | 226.76                | 105.70 | 8.84                  | 0.75 |
| 0.6                           | 10.69               | 0.79 | 24.16               | 7.20 | 124.40              | 40.39 | 179.21              | 63.60 | 732.07                | 230.93 | 43.80                 | 4.67 |

Table S11: Computed liquid densities ( $\rho$ ) of water-sucrose mixtures reported in Figure 5 of the main text. Temperature and pressure are 298 K and 1 atm, respectively. For the refined OPLS force field, LJ energy parameters ( $\epsilon$ ) and partial atomic charges ( $q$ ) of the original OPLS force field<sup>2,3</sup> are scaled by factors 0.8 and 0.95, respectively. All densities are reported in units of kg/m<sup>3</sup>. 95% confidence intervals are computed from block averages.

|                      | original OPLS <sup>3</sup> |     | refined OPLS |     |
|----------------------|----------------------------|-----|--------------|-----|
| $w_{\text{sucrose}}$ | $\bar{\rho}$               | 95% | $\bar{\rho}$ | 95% |
| 0.2                  | 1093.3                     | 0.8 | 1090.3       | 0.7 |
| 0.3                  | 1138.4                     | 0.5 | 1133.3       | 0.7 |
| 0.4                  | 1186.5                     | 1.2 | 1180.0       | 0.5 |
| 0.5                  | 1238.6                     | 1.9 | 1229.8       | 0.8 |
| 0.6                  | 1294.7                     | 2.5 | 1282.6       | 1.4 |



Table S12: Computed thermodynamic factors ( $\Gamma$ ) of water-sucrose mixtures reported in units of Figure 5 of the main text. Temperature and pressure are 298 K and 1 atm, respectively. For the refined OPLS force field, LJ energy parameters ( $\epsilon$ ) and partial atomic charges ( $q$ ) of the original OPLS force field<sup>2,3</sup> are scaled by factors 0.8 and 0.95, respectively. 95% confidence intervals are computed from 5 independent simulations. No additional independent simulations were performed for the calculation of thermodynamic factors based on the original OPLS force field.

|                      | original OPLS <sup>3</sup> |     | refined OPLS   |      |
|----------------------|----------------------------|-----|----------------|------|
| $w_{\text{sucrose}}$ | $\bar{\Gamma}$             | 95% | $\bar{\Gamma}$ | 95%  |
| 0.2                  | 0.99                       | -   | 1.09           | 0.04 |
| 0.3                  | 0.89                       | -   | 1.18           | 0.06 |
| 0.4                  | 1.08                       | -   | 1.36           | 0.05 |
| 0.5                  | 1.08                       | -   | 1.47           | 0.04 |
| 0.6                  | 1.13                       | -   | 1.90           | 0.15 |

Table S13: Computed shear viscosities ( $\eta$ ) of water-sucrose mixtures reported in Figure 5 of the main text. Temperature and pressure are 298 K and 1 atm, respectively. For the refined OPLS force field, LJ energy parameters ( $\epsilon$ ) and partial atomic charges ( $q$ ) of the original OPLS force field<sup>2,3</sup> are scaled by factors 0.8 and 0.95, respectively. All shear viscosities are reported in units of cP. 95% confidence intervals are computed from 5 independent simulations.

| $w_{\text{sucrose}}$ | original OPLS <sup>3</sup> |       | refined OPLS |       |
|----------------------|----------------------------|-------|--------------|-------|
|                      | $\bar{\eta}$               | 95%   | $\bar{\eta}$ | 95%   |
| 0.2                  | 1.45                       | 0.08  | 1.38         | 0.07  |
| 0.3                  | 2.45                       | 0.11  | 2.16         | 0.10  |
| 0.4                  | 5.59                       | 0.31  | 4.18         | 0.14  |
| 0.5                  | 23.00                      | 4.60  | 11.83        | 1.53  |
| 0.6                  | 179.21                     | 63.60 | 57.63        | 16.00 |

Table S14: Computed self-diffusion coefficients of sucrose ( $D_{\text{sucrose,self}}$ ) in water-sucrose mixtures reported in Figure 5 of the main text. Temperature and pressure are 298 K and 1 atm, respectively. For the refined OPLS force field, LJ energy parameters ( $\epsilon$ ) and partial atomic charges ( $q$ ) of the original OPLS force field<sup>2,3</sup> are scaled by factors 0.8 and 0.95, respectively. All self-diffusivities are reported in units of  $10^{-12}$  m<sup>2</sup>/s. 95% confidence intervals are computed from 5 independent simulations.

|                      | original OPLS <sup>3</sup>      |      | refined OPLS                    |      |
|----------------------|---------------------------------|------|---------------------------------|------|
| $w_{\text{sucrose}}$ | $\bar{D}_{\text{sucrose,self}}$ | 95%  | $\bar{D}_{\text{sucrose,self}}$ | 95%  |
| 0.2                  | 337.72                          | 5.19 | 377.85                          | 5.20 |
| 0.3                  | 198.34                          | 3.52 | 245.29                          | 4.51 |
| 0.4                  | 93.12                           | 1.70 | 133.44                          | 1.83 |
| 0.5                  | 25.67                           | 1.72 | 50.15                           | 2.53 |
| 0.6                  | 4.73                            | 0.27 | 12.85                           | 0.52 |

Table S15: Computed self-diffusion coefficients of water ( $D_{\text{water,self}}$ ) in water-sucrose mixtures reported in Figure 5 of the main text. Temperature and pressure are 298 K and 1 atm, respectively. For the refined OPLS force field, LJ energy parameters ( $\epsilon$ ) and partial atomic charges ( $q$ ) of the original OPLS force field<sup>2,3</sup> are scaled by factors 0.8 and 0.95, respectively. All self-diffusivities are reported in units of  $10^{-11}$  m<sup>2</sup>/s. 95% confidence intervals are computed from 5 independent simulations.

| $w_{\text{sucrose}}$ | original OPLS <sup>3</sup>    |      | refined OPLS                  |      |
|----------------------|-------------------------------|------|-------------------------------|------|
|                      | $\bar{D}_{\text{water,self}}$ | 95%  | $\bar{D}_{\text{water,self}}$ | 95%  |
| 0.2                  | 176.51                        | 0.75 | 181.03                        | 0.70 |
| 0.3                  | 131.09                        | 0.58 | 137.37                        | 0.18 |
| 0.4                  | 89.20                         | 0.36 | 96.06                         | 0.88 |
| 0.5                  | 50.82                         | 1.01 | 56.55                         | 0.56 |
| 0.6                  | 23.10                         | 0.79 | 27.84                         | 0.49 |

Table S16: Computed Fick diffusion coefficients ( $D_{\text{Fick}}$ ) of water-sucrose mixtures reported in Figure 5 of the main text. Temperature and pressure are 298 K and 1 atm, respectively. For the refined OPLS force field, LJ energy parameters ( $\epsilon$ ) and partial atomic charges ( $q$ ) of the original OPLS force field<sup>2,3</sup> are scaled by factors 0.8 and 0.95, respectively. All diffusivities are reported in units of  $10^{-11}$  m<sup>2</sup>/s. 95% confidence intervals are computed from error propagation analysis based on 5 independent simulations for computed Maxwell-Stefan diffusion coefficients and thermodynamic factors.

|                      | original OPLS <sup>3</sup> |      | refined OPLS            |      |
|----------------------|----------------------------|------|-------------------------|------|
| $w_{\text{sucrose}}$ | $\bar{D}_{\text{Fick}}$    | 95%  | $\bar{D}_{\text{Fick}}$ | 95%  |
| 0.2                  | 43.46                      | 2.15 | 47.28                   | 3.01 |
| 0.3                  | 29.14                      | 2.34 | 37.09                   | 2.27 |
| 0.4                  | 21.45                      | 1.32 | 27.88                   | 1.55 |
| 0.5                  | 12.61                      | 1.02 | 17.35                   | 1.81 |
| 0.6                  | 5.75                       | 1.24 | 10.70                   | 3.11 |

Table S17: Computed liquid densities ( $\rho$ ) of water-glucose mixtures reported in Figure 6 of the main text. Temperature and pressure are 298 K and 1 atm, respectively. For the refined OPLS force field, LJ energy parameters ( $\epsilon$ ) and partial atomic charges ( $q$ ) of the original OPLS force field<sup>2,3</sup> are scaled by factors 0.8 and 0.95, respectively. All densities are reported in units of kg/m<sup>3</sup>. 95% confidence intervals are computed from block averages.

|                      | original OPLS <sup>3</sup> |     | refined OPLS |     |
|----------------------|----------------------------|-----|--------------|-----|
| $w_{\text{glucose}}$ | $\bar{\rho}$               | 95% | $\bar{\rho}$ | 95% |
| 0.2                  | 1094.8                     | 0.8 | 1091.1       | 0.8 |
| 0.3                  | 1140.8                     | 0.8 | 1135.4       | 1.0 |
| 0.4                  | 1189.5                     | 1.1 | 1182.4       | 1.1 |
| 0.5                  | 1241.6                     | 1.6 | 1232.4       | 1.6 |

Table S18: Computed thermodynamic factors ( $\Gamma$ ) of water-glucose mixtures reported in Figure 6 of the main text. Temperature and pressure are 298 K and 1 atm, respectively. For the refined OPLS force field, LJ energy parameters ( $\epsilon$ ) and partial atomic charges ( $q$ ) of the original OPLS force field<sup>2,3</sup> are scaled by factors 0.8 and 0.95, respectively. 95% confidence intervals are computed from 5 independent simulations.

| $w_{\text{glucose}}$ | original OPLS <sup>3</sup> |      | refined OPLS   |      |
|----------------------|----------------------------|------|----------------|------|
|                      | $\bar{\Gamma}$             | 95%  | $\bar{\Gamma}$ | 95%  |
| 0.2                  | 0.91                       | 0.01 | 1.06           | 0.01 |
| 0.3                  | 0.90                       | 0.03 | 1.12           | 0.01 |
| 0.4                  | 0.95                       | 0.02 | 1.21           | 0.03 |
| 0.5                  | 0.97                       | 0.04 | 1.34           | 0.03 |

Table S19: Computed shear viscosities ( $\eta$ ) of water-glucose mixtures reported in Figure 6 of the main text. Temperature and pressure are 298 K and 1 atm, respectively. For the refined OPLS force field, LJ energy parameters ( $\epsilon$ ) and partial atomic charges ( $q$ ) of the original OPLS force field<sup>2,3</sup> are scaled by factors 0.8 and 0.95, respectively. All shear viscosities are reported in cP. 95% confidence intervals are computed from 5 independent simulations.

| $w_{\text{glucose}}$ | original OPLS <sup>3</sup> |      | refined OPLS |      |
|----------------------|----------------------------|------|--------------|------|
|                      | $\bar{\eta}$               | 95%  | $\bar{\eta}$ | 95%  |
| 0.2                  | 1.35                       | 0.02 | 1.29         | 0.08 |
| 0.3                  | 2.23                       | 0.06 | 2.01         | 0.15 |
| 0.4                  | 4.68                       | 0.23 | 3.61         | 0.27 |
| 0.5                  | 13.38                      | 0.46 | 8.45         | 0.43 |



Table S20: Computed self-diffusion coefficients of glucose ( $D_{\text{glucose,self}}$ ) in water-glucose mixtures reported in Figure 6 of the main text. Temperature and pressure are 298 K and 1 atm, respectively. For the refined OPLS force field, LJ energy parameters ( $\epsilon$ ) and partial atomic charges ( $q$ ) of the original OPLS force field<sup>2,3</sup> are scaled by factors 0.8 and 0.95, respectively. All self-diffusivities are reported in units of  $10^{-12}$  m<sup>2</sup>/s. 95% confidence intervals are computed from 5 independent simulations.

| $w_{\text{glucose}}$ | original OPLS <sup>3</sup>   |      | refined OPLS                 |      |
|----------------------|------------------------------|------|------------------------------|------|
|                      | $\bar{D}_{\text{s,sucrose}}$ | 95%  | $\bar{D}_{\text{s,sucrose}}$ | 95%  |
| 0.2                  | 463.13                       | 4.43 | 517.54                       | 3.67 |
| 0.3                  | 283.99                       | 4.58 | 346.76                       | 1.16 |
| 0.4                  | 146.87                       | 0.26 | 204.08                       | 0.91 |
| 0.5                  | 57.84                        | 0.68 | 95.73                        | 1.63 |

Table S21: Computed self-diffusion coefficients of water ( $D_{\text{water,self}}$ ) in water-glucose mixtures reported in units of Figure 6 of the main text. Temperature and pressure are 298 K and 1 atm, respectively. For the refined OPLS force field, LJ energy parameters ( $\epsilon$ ) and partial atomic charges ( $q$ ) of the original OPLS force field<sup>2,3</sup> are scaled by factors 0.8 and 0.95, respectively. All self-diffusivities are reported in units of  $10^{-11}$  m<sup>2</sup>/s. 95% confidence intervals are computed from 5 independent simulations.

| $w_{\text{glucose}}$ | original OPLS <sup>3</sup> |      | refined OPLS               |      |
|----------------------|----------------------------|------|----------------------------|------|
|                      | $\bar{D}_{\text{s,water}}$ | 95%  | $\bar{D}_{\text{s,water}}$ | 95%  |
| 0.2                  | 179.73                     | 0.29 | 185.40                     | 0.47 |
| 0.3                  | 132.45                     | 0.37 | 139.80                     | 0.51 |
| 0.4                  | 88.89                      | 0.29 | 97.20                      | 0.27 |
| 0.5                  | 52.23                      | 0.44 | 59.72                      | 0.29 |

Table S22: Computed Fick diffusion coefficients ( $D_{\text{Fick}}$ ) of water-glucose mixtures reported in Figure 6 of the main text. Temperature and pressure are 298 K and 1 atm, respectively. For the refined OPLS force field, LJ energy parameters ( $\epsilon$ ) and partial atomic charges ( $q$ ) of the original OPLS force field<sup>2,3</sup> are scaled by factors 0.8 and 0.95, respectively. All diffusivities are reported in units of  $10^{-11}$  m<sup>2</sup>/s. 95% confidence intervals are computed from error propagation analysis based on 5 independent simulations for computed Maxwell-Stefan diffusion coefficients and thermodynamic factors.

|                      | original OPLS <sup>3</sup> |      | refined OPLS            |      |
|----------------------|----------------------------|------|-------------------------|------|
| $w_{\text{glucose}}$ | $\bar{D}_{\text{Fick}}$    | 95%  | $\bar{D}_{\text{Fick}}$ | 95%  |
| 0.2                  | 56.50                      | 2.59 | 64.75                   | 2.70 |
| 0.3                  | 41.24                      | 1.72 | 49.90                   | 3.07 |
| 0.4                  | 28.42                      | 2.18 | 37.70                   | 2.13 |
| 0.5                  | 16.91                      | 1.08 | 25.53                   | 2.19 |

## References

- (1) Allen, M. P.; Tildesley, D. J. *Computer Simulation of Liquids*, 2nd ed.; Oxford University Press: Croydon, 2017.
- (2) Jorgensen, W. L.; Maxwell, D. S.; Tirado-Rives, J. Development and Testing of the OPLS All-Atom Force Field on Conformational Energetics and Properties of Organic Liquids. *J. Am. Chem. Soc.* **1996**, *118*, 11225–11236.
- (3) Damm, W.; Frontera, A.; Tirado-Rives, J.; Jorgensen, W. L. OPLS All-Atom Force Field for Carbohydrates. *J. Comput. Chem.* **1997**, *18*, 1955–1970.
- (4) Kirschner, K. N.; Yongye, A. B.; Tschampel, S. M.; González-Outeiriño, J.; Daniels, C. R.; Foley, B. L.; Woods, R. J. GLYCAM06: A Generalizable Biomolecular Force Field. Carbohydrates. *J. Comput. Chem.* **2008**, *29*, 622–655.
- (5) Lay, W. K.; Miller, M. S.; Elcock, A. H. Optimizing Solute-Solute Interactions in the GLYCAM06 and CHARMM36 Carbohydrate Force Fields Using Osmotic Pressure Measurements. *J. Chem. Theory Comput.* **2016**, *12*, 1401–1407.
- (6) Dubbeldam, D.; Calero, S.; Vlugt, T. J. H. iRASPA: GPU-accelerated Visualization Software for Materials Scientists. *Mol. Simul.* **2018**, *44*, 653–676.
